# Supplementary material for: MicrobiomeGWAS: A Tool for Identifying Host Genetic Variants Associated with Microbiome Composition
Source: MDPI journal article supplement (doi:10.3390/genes13071224), 2022-07-09
Supplement: s1 [file s1]

| Unweighted UniFrac                 |      | $Z_M$              |           |           | $Z_I$     |           |           | $Q$       |           |           |
|------------------------------------|------|--------------------|-----------|-----------|-----------|-----------|-----------|-----------|-----------|-----------|
| $MAF = 0.2$                        | N    | $\alpha = 10^{-3}$ | $10^{-5}$ | $10^{-7}$ | $10^{-3}$ | $10^{-5}$ | $10^{-7}$ | $10^{-3}$ | $10^{-5}$ | $10^{-7}$ |
| asymptotic approximation           | 100  | 3.3                | 20.2      | 159.8     | 2.7       | 11.9      | 65.7      | 4.0       | 26.2      | 240.4     |
|                                    | 200  | 2.6                | 11.6      | 68.5      | 2.2       | 7.6       | 33.1      | 3.0       | 14.5      | 89.8      |
|                                    | 500  | 1.8                | 4.9       | 15.5      | 1.6       | 3.4       | 7.8       | 2.0       | 5.3       | 17.9      |
|                                    | 1000 | 1.6                | 3.2       | 8.7       | 1.4       | 2.5       | 6.4       | 1.6       | 3.3       | 9.6       |
| adjusted for skewness and kurtosis | 100  | 1.0                | 1.2       | 0.7       | 1.0       | 1.0       | 1.0       | 1.0       | 1.3       | 1.5       |
|                                    | 200  | 1.0                | 1.1       | 1.8       | 1.0       | 1.0       | 1.0       | 1.1       | 1.1       | 1.9       |
|                                    | 500  | 1.0                | 1.0       | 1.4       | 1.0       | 0.9       | 0.7       | 0.9       | 0.9       | 0.7       |
|                                    | 1000 | 1.0                | 0.9       | 1.2       | 1.0       | 0.9       | 1.0       | 0.9       | 1.0       | 0.6       |
| $MAF = 0.5$                        | N    | $\alpha = 10^{-3}$ | $10^{-5}$ | $10^{-7}$ | $10^{-3}$ | $10^{-5}$ | $10^{-7}$ | $10^{-3}$ | $10^{-5}$ | $10^{-7}$ |
| asymptotic approximation           | 100  | 1.7                | 4.2       | 11.3      | 2.7       | 12.2      | 70.2      | 2.6       | 9.7       | 48.4      |
|                                    | 200  | 1.4                | 2.8       | 5.7       | 2.2       | 7.1       | 30.0      | 2.0       | 5.7       | 19.8      |
|                                    | 500  | 1.3                | 1.9       | 4.0       | 1.6       | 3.4       | 9.2       | 1.6       | 2.9       | 6.8       |
|                                    | 1000 | 1.2                | 1.6       | 2.6       | 1.4       | 2.6       | 4.9       | 1.4       | 2.2       | 3.9       |
| adjusted for skewness and kurtosis | 100  | 1.0                | 0.9       | 0.8       | 1.0       | 1.1       | 1.5       | 1.0       | 1.0       | 0.9       |
|                                    | 200  | 1.0                | 1.0       | 1.0       | 1.0       | 1.0       | 0.6       | 1.0       | 1.0       | 0.8       |
|                                    | 500  | 1.0                | 1.0       | 0.9       | 1.0       | 1.0       | 1.0       | 1.0       | 1.0       | 0.8       |
|                                    | 1000 | 1.0                | 1.0       | 1.4       | 1.0       | 1.0       | 0.4       | 1.0       | 1.0       | 0.9       |

| Weighted UniFrac                   |      | $Z_M$              |           |           | $Z_I$     |           |           | $Q$       |           |           |
|------------------------------------|------|--------------------|-----------|-----------|-----------|-----------|-----------|-----------|-----------|-----------|
| $MAF = 0.2$                        | N    | $\alpha = 10^{-3}$ | $10^{-5}$ | $10^{-7}$ | $10^{-3}$ | $10^{-5}$ | $10^{-7}$ | $10^{-3}$ | $10^{-5}$ | $10^{-7}$ |
| asymptotic approximation           | 100  | 5.5                | 51.6      | 610.0     | 4.7       | 36.1      | 342.8     | 7.3       | 80.9      | 1147.9    |
|                                    | 200  | 3.7                | 23.0      | 187.3     | 3.1       | 15.8      | 105.5     | 4.6       | 32.9      | 316.7     |
|                                    | 500  | 2.4                | 9.4       | 45.2      | 2.1       | 6.7       | 25.5      | 2.8       | 11.9      | 64.1      |
|                                    | 1000 | 2.0                | 5.7       | 21.3      | 1.8       | 4.4       | 14.0      | 2.2       | 6.9       | 28.5      |
| adjusted for skewness and kurtosis | 100  | 1.0                | 1.2       | 0.7       | 1.0       | 1.1       | 0.6       | 1.0       | 1.5       | 2.0       |
|                                    | 200  | 1.0                | 1.1       | 1.0       | 1.0       | 1.1       | 0.7       | 0.9       | 1.3       | 1.8       |
|                                    | 500  | 1.0                | 1.1       | 1.3       | 1.0       | 1.0       | 0.9       | 0.9       | 1.0       | 1.7       |
|                                    | 1000 | 1.0                | 1.0       | 1.2       | 1.0       | 1.0       | 0.8       | 0.9       | 1.0       | 1.1       |
| $MAF = 0.5$                        | N    | $\alpha = 10^{-3}$ | $10^{-5}$ | $10^{-7}$ | $10^{-3}$ | $10^{-5}$ | $10^{-7}$ | $10^{-3}$ | $10^{-5}$ | $10^{-7}$ |
| asymptotic approximation           | 100  | 1.8                | 4.2       | 10.8      | 4.0       | 25.7      | 207.1     | 3.6       | 19.2      | 142.1     |
|                                    | 200  | 1.5                | 2.8       | 6.9       | 2.8       | 12.0      | 67.3      | 2.5       | 9.1       | 41.6      |
|                                    | 500  | 1.3                | 1.9       | 3.4       | 2.0       | 5.6       | 22.2      | 1.8       | 4.3       | 13.9      |
|                                    | 1000 | 1.2                | 1.5       | 2.4       | 1.7       | 3.9       | 11.2      | 1.6       | 3.0       | 7.0       |
| adjusted for skewness and kurtosis | 100  | 1.0                | 1.0       | 0.6       | 1.0       | 1.0       | 0.5       | 1.0       | 1.1       | 0.7       |
|                                    | 200  | 1.0                | 1.0       | 1.0       | 1.0       | 1.0       | 0.6       | 1.0       | 1.1       | 0.4       |
|                                    | 500  | 1.0                | 0.9       | 1.0       | 1.0       | 1.0       | 0.8       | 1.0       | 1.1       | 1.2       |
|                                    | 1000 | 1.0                | 1.0       | 0.7       | 1.0       | 1.0       | 1.0       | 1.0       | 1.0       | 1.3       |

**Table S1:** Type-I error rates estimated based on  $10^8$  simulations. Minor allele frequency = 20% and 50%. Simulations were based on the weighted and the unweighted UniFrac distance matrices of the gut microbiome data from the American Gut Project. Reported are the type-I error inflation factor. A value greater than 1 indicates an inflated type-I error.

|           |         |                      | unweighted UniFrac |       |             | weighted UniFrac |       |             |
|-----------|---------|----------------------|--------------------|-------|-------------|------------------|-------|-------------|
| SNP       | locus   | Annotated gene       | $P_M$              | $P_I$ | $P_{Joint}$ | $P_M$            | $P_I$ | $P_{Joint}$ |
| rs2036534 | 15q25.1 | <i>CHRNA3/4/5</i>    | 0.425              | 0.307 | 0.610       | 0.167            | 0.039 | 0.111       |
| rs1051730 |         |                      | 0.020              | 0.174 | 0.053       | 0.401            | 0.426 | 0.675       |
| rs2736100 | 5p15.33 | <i>TERT</i>          | 0.089              | 0.252 | 0.201       | 0.267            | 0.257 | 0.435       |
| rs401681  |         | <i>CLPTMIL</i>       | 0.056              | 0.898 | 0.047       | 0.005            | 0.379 | 0.013       |
| rs6489769 | 12p13.3 | <i>RAD52</i>         | 0.584              | 0.403 | 0.656       | 0.598            | 0.632 | 0.794       |
| rs1333040 | 9p21.3  | <i>CDKN2A/CDKN2B</i> | 0.249              | 0.614 | 0.405       | 0.224            | 0.437 | 0.453       |

**Table S2:** Association P-values between lung cancer risk SNPs and microbiome composition in the EAGLE data.  $P_M$ : P-values for testing main effects.  $P_I$ : P-values for testing SNP/smoking interactions.  $P_{Joint}$ : P-value for jointly testing main and interaction effects.

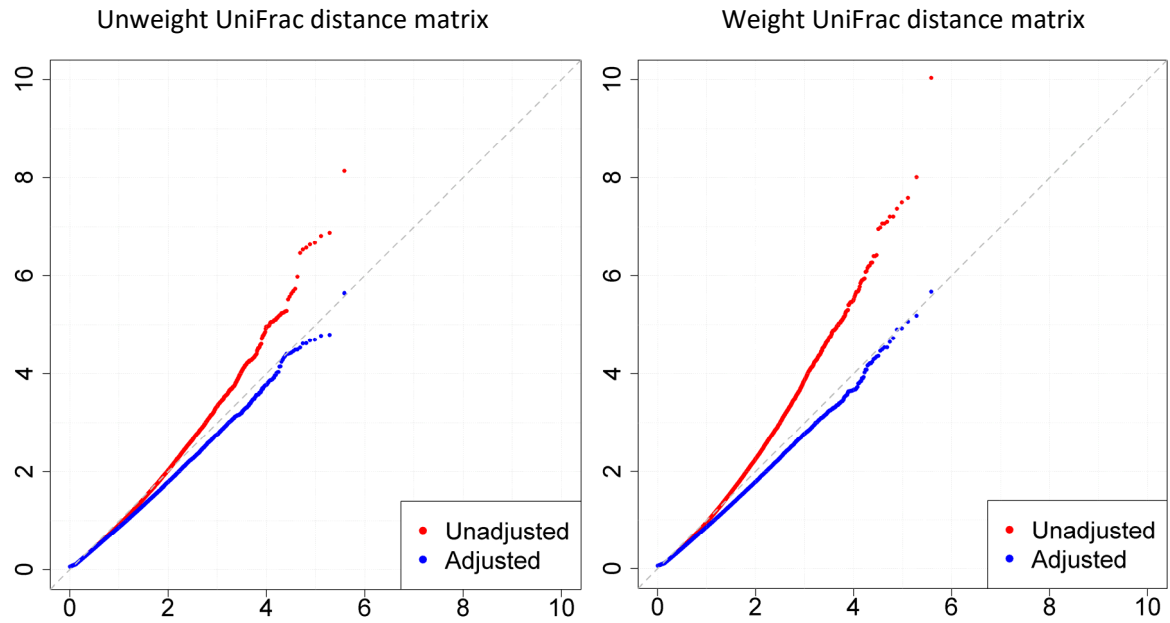

**Figure S1:** Quantile-quantile (QQ) plot for association P-values testing the joint effects (main effect and SNP by smoking interaction) using the unweighted UniFrac distance matrices. “Adjusted”: P-values were corrected for skewness and kurtosis. “Unadjusted”: P-values were approximated based on the asymptotic distribution  $N(0,1)$ . The left (right) panel was based on the analysis using the unweighted (weighted) UniFrac distance matrix.

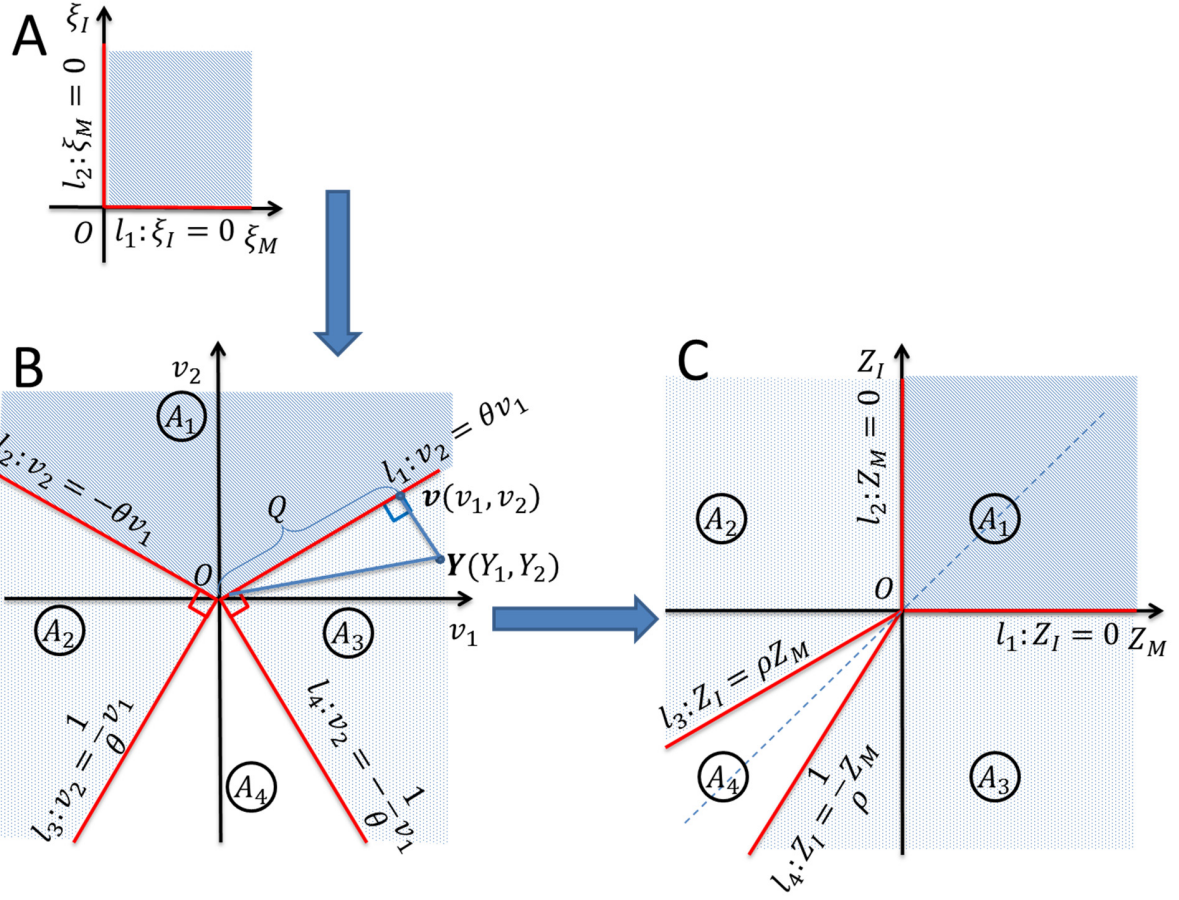

**Figure S2:** Derivation of the likelihood ratio statistic  $Q$  in (7) and (8). (A) The original parameter space (shadow area). (B) The transformed parameter space. The two lines  $l_1$  and  $l_2$  characterizing the boundaries in (A) are transformed to  $l_1$  and  $l_2$  in (B). When  $(Y_1, Y_2) \in A_1$ ,  $Q$  is maximized when  $v_1 = Y_1$  and  $v_2 = Y_2$ , which leads to  $Q = Y^T Y$ . When  $(Y_1, Y_2) \in A_4$ ,  $Q$  is maximized when  $v_1 = 0$  and  $v_2 = 0$ , which leads to  $Q = 0$ . When  $(Y_1, Y_2) \in A_3$ ,  $Q$  is maximized when  $(v_1, v_2)$  is the projection of  $(Y_1, Y_2)$  onto the boundary represented as  $l_1$  in B, which leads to  $Q = (Y_2 + Y_1/\theta)^2/(1 + \theta^{-2})$ .  $Q$  can be similarly derived when  $(Y_1, Y_2) \in A_2$ . (C). We perform an inverse transformation using  $\Sigma^{1/2}$  to the original parameter space. The four lines characterizing the four parts are now represented in C.

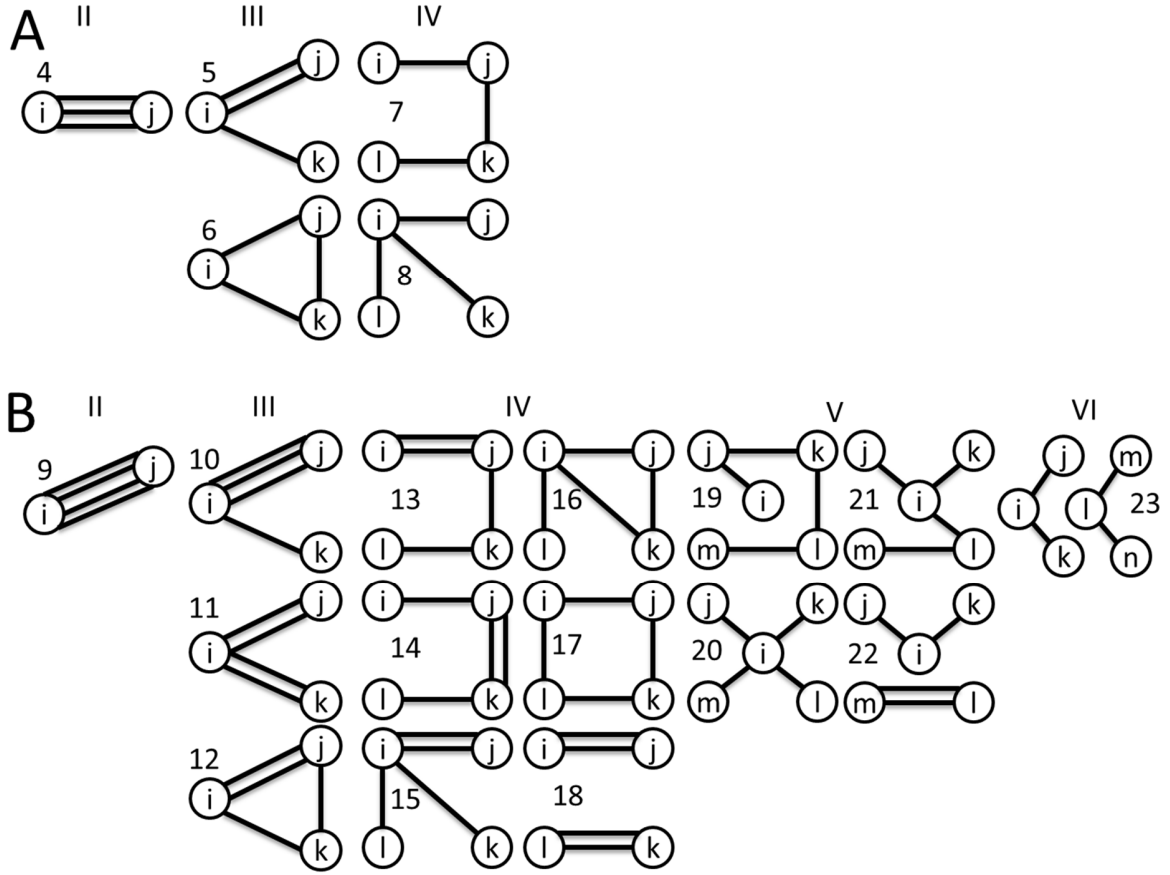

**Figure S3:** (A) All combinations of  $(i, j, m, n, s, t)$  with  $EG'_{ij}G'_{mn}G'_{st} \neq 0$ , where  $G'_{ij} = G_{ij} - EG_{ij}$ . (B) All 15 combinations of  $(i, j, m, n, s, t, x, y)$  with  $EG'_{ij}G'_{mn}G'_{st}G'_{xy} \neq 0$ . For example, The figure labeled as “4” represents  $EG'^3_{ij} \neq 0$ . The figure labeled as “5” represents  $EG'^2_{ij}G'_{ik} \neq 0$ , the figure labeled as “10” represents  $EG'^3_{ij}G'_{ik} \neq 0$ , The figure labeled as “18” represents  $EG'^2_{ij}G'^2_{kl} \neq 0$ . All detailed calculations are in the next pages.

The expectation of the corresponding product of  $G_{ij} = |g_i - g_j|$  could be calculated based on the distribution of  $g_i$ . Denote  $p_t = P(g_i = t)$ ,  $t = 0, 1, 2$ , we can write the formula directly from the definition. Here we list the formulas of the combination in **Figure S3A**.

$$\left\{ \begin{array}{l} E(G_{ij}^3) = \sum_{i,j,k \in \{0,1,2\}} p_i p_j p_k |i - j|^3 = 2p_0 p_1 + 2p_1 p_2 + 16p_0 p_2 \\ E(G_{ij}^2 G_{ik}) = \sum_{i,j,k \in \{0,1,2\}} p_i p_j p_k |i - j|^2 |i - k| = p_1(1 - p_1) + 4p_0 p_2(2 + p_1) \\ E(G_{ij} G_{jk} G_{ik}) = \sum_{i,j,k \in \{0,1,2\}} p_i p_j p_k |i - j| |j - k| |i - k| = 12p_0 p_1 p_2 \\ E(G_{ij} G_{jk} G_{kl}) = \sum_{i,j,k,l \in \{0,1,2\}} p_i p_j p_k p_l |i - j| |j - k| |k - l| = 2p_1^2 + 2(p_1^2 - 4p_0 p_2)(p_1^2 - 2p_1 - 2p_0 p_2) \\ E(G_{ij} G_{ik} G_{il}) = \sum_{i,j,k,l \in \{0,1,2\}} p_i p_j p_k p_l |i - j| |i - k| |i - l| = p_0(p_1 + 2p_2)^3 + p_1(p_0 + p_2)^3 + p_2(2p_0 + p_1)^3 \end{array} \right. \quad (S1)$$

The formulas of the combination in **Figure S3B** is a little complicated, we just list the summation.

$$\left\{ \begin{array}{l} E(G_{ij}^4) = \sum_{i,j \in \{0,1,2\}} p_i p_j |i - j|^4 \\ E(G_{ij}^3 G_{ik}) = \sum_{i,j,k \in \{0,1,2\}} p_i p_j p_k |i - j|^3 |i - k| \\ E(G_{ij}^2 G_{ik}^2) = \sum_{i,j,k \in \{0,1,2\}} p_i p_j p_k |i - j|^2 |i - k|^2 \\ E(G_{ij}^2 G_{jk} G_{ik}) = \sum_{i,j,k \in \{0,1,2\}} p_i p_j p_k |i - j|^2 |j - k| |i - k| \\ E(G_{ij}^2 G_{jk} G_{kl}) = \sum_{i,j,k,l \in \{0,1,2\}} p_i p_j p_k p_l |i - j|^2 |j - k| |k - l| \\ E(G_{ij} G_{jk}^2 G_{kl}) = \sum_{i,j,k,l \in \{0,1,2\}} p_i p_j p_k p_l |i - j| |j - k|^2 |k - l| \\ E(G_{ij}^2 G_{ik} G_{il}) = \sum_{i,j,k,l \in \{0,1,2\}} p_i p_j p_k p_l |i - j|^2 |i - k| |i - l| \\ E(G_{ij} G_{jk} G_{ik} G_{il}) = \sum_{i,j,k,l \in \{0,1,2\}} p_i p_j p_k p_l |i - j| |j - k| |i - k| |i - l| \\ E(G_{ij} G_{jk} G_{kl} G_{il}) = \sum_{i,j,k,l \in \{0,1,2\}} p_i p_j p_k p_l |i - j| |j - k| |k - l| |i - l| \\ E(G_{ij}^2 G_{kl}^2) = \sum_{i,j,k,l \in \{0,1,2\}} p_i p_j p_k p_l |i - j|^2 |k - l|^2 = E(G_{ij}^2)^2 \\ E(G_{ij} G_{jk} G_{kl} G_{lm}) = \sum_{i,j,k,l,m \in \{0,1,2\}} p_i p_j p_k p_l p_m |i - j| |j - k| |k - l| |l - m| \\ E(G_{ij} G_{ik} G_{il} G_{im}) = \sum_{i,j,k,l,m \in \{0,1,2\}} p_i p_j p_k p_l p_m |i - j| |i - k| |i - l| |i - m| \\ E(G_{ij} G_{ik} G_{il} G_{lm}) = \sum_{i,j,k,l,m \in \{0,1,2\}} p_i p_j p_k p_l p_m |i - j| |i - k| |i - l| |l - m| \\ E(G_{ij} G_{ik} G_{lm}^2) = \sum_{i,j,k,l,m \in \{0,1,2\}} p_i p_j p_k p_l p_m |i - j| |i - k| |l - m|^2 = E(G_{ij} G_{ik}) E(G_{ij}^2) \\ E(G_{ij} G_{ik} G_{lm} G_{ln}) = \sum_{i,j,k,l,m,n \in \{0,1,2\}} p_i p_j p_k p_l p_m p_n |i - j| |i - k| |l - m| |l - n| = E(G_{ij} G_{ik})^2 \end{array} \right. \quad (S2)$$

Based on the definition that  $\bar{G}_{ij} = G_{ij} - E(G_{ij})$ , the expectation of the product of  $\bar{G}_{ij}$  could be calculated from the following equations:

$$\left\{ \begin{array}{l}
 E(\bar{G}_{ij}^3) = E(G_{ij}^3) - 3E(G_{ij}^2)E(G_{ij}) + 2E(G_{ij})^3 \\
 E(\bar{G}_{ij}^2 \bar{G}_{ik}) = E(G_{ij}^2 G_{ik}) - E(G_{ij}^2)E(G_{ik}) - 2E(G_{ij} G_{ik})E(G_{ij}) + 2E(G_{ij})^3 \\
 E(\bar{G}_{ij} \bar{G}_{jk} \bar{G}_{ik}) = E(G_{ij} G_{jk} G_{ik}) - 3E(G_{ij} G_{ik})E(G_{ij}) + 2E(G_{ij})^3 \\
 E(\bar{G}_{ij} \bar{G}_{jk} \bar{G}_{kl}) = E(G_{ij} G_{jk} G_{kl}) - 2E(G_{ij} G_{ik})E(G_{ij}) + E(G_{ij})^3 \\
 E(\bar{G}_{ij} \bar{G}_{ik} \bar{G}_{il}) = E(G_{ij} G_{ik} G_{il}) - 3E(G_{ij} G_{ik})E(G_{ij}) + 2E(G_{ij})^3 \\
 E(\bar{G}_{ij}^4) = E(G_{ij}^4) - 4E(G_{ij}^3)E(G_{ij}) + 6E(G_{ij}^2)E(G_{ij})^2 - 3E(G_{ij})^4 \\
 E(\bar{G}_{ij}^3 \bar{G}_{ik}) = E(G_{ij}^3 G_{ik}) - \begin{pmatrix} 3E(G_{ij}^2 G_{ik}) \\ -E(G_{ij}^3) \end{pmatrix} E(G_{ij}) + 3 \begin{pmatrix} E(G_{ij} G_{ik}) \\ +E(G_{ij}^2) \end{pmatrix} E(G_{ij})^2 - 3E(G_{ij})^4 \\
 E(\bar{G}_{ij}^2 \bar{G}_{ik}^2) = E(G_{ij}^2 G_{ik}^2) - 4E(G_{ij}^2 G_{ik})E(G_{ij}) + \begin{pmatrix} 4E(G_{ij} G_{ik}) \\ +2E(G_{ij}^2) \end{pmatrix} E(G_{ij})^2 - 3E(G_{ij})^4 \\
 E(\bar{G}_{ij}^2 \bar{G}_{jk} \bar{G}_{ik}) = E(G_{ij}^2 G_{jk} G_{ik}) - 2 \begin{pmatrix} E(G_{ij} G_{jk} G_{ik}) \\ +E(G_{ij}^2 G_{ik}) \end{pmatrix} E(G_{ij}) + \begin{pmatrix} 5E(G_{ij} G_{ik}) \\ +E(G_{ij}^2) \end{pmatrix} E(G_{ij})^2 - 3E(G_{ij})^4 \\
 E(\bar{G}_{ij}^2 \bar{G}_{jk} \bar{G}_{kl}) = E(G_{ij}^2 G_{jk} G_{kl}) - \begin{pmatrix} 2E(G_{ij} G_{jk} G_{kl}) \\ +E(G_{ij}^2 G_{ik}) \end{pmatrix} E(G_{ij}) + 3E(G_{ij} G_{ik})E(G_{ij})^2 - E(G_{ij})^4 \\
 E(\bar{G}_{ij} \bar{G}_{jk}^2 \bar{G}_{kl}) = E(G_{ij} G_{jk}^2 G_{kl}) - 2 \begin{pmatrix} E(G_{ij} G_{jk} G_{kl}) \\ +E(G_{ij}^2 G_{ik}) \end{pmatrix} E(G_{ij}) + \begin{pmatrix} 4E(G_{ij} G_{ik}) \\ +E(G_{ij}^2) \end{pmatrix} E(G_{ij})^2 - 2E(G_{ij})^4 \\
 E(\bar{G}_{ij}^2 \bar{G}_{ik} \bar{G}_{il}) = E(G_{ij}^2 G_{ik} G_{il}) - 2 \begin{pmatrix} E(G_{ij} G_{jk} G_{kl}) \\ +E(G_{ij}^2 G_{ik}) \end{pmatrix} E(G_{ij}) + \begin{pmatrix} 5E(G_{ij} G_{ik}) \\ +E(G_{ij}^2) \end{pmatrix} E(G_{ij})^2 - 3E(G_{ij})^4 \\
 E(\bar{G}_{ij} \bar{G}_{jk} \bar{G}_{ik} \bar{G}_{il}) = E(G_{ij} G_{jk} G_{ik} G_{il}) - \begin{pmatrix} E(G_{ij} G_{ik} G_{il}) \\ +E(G_{ij} G_{jk} G_{ik}) \\ +2E(G_{ij} G_{jk} G_{kl}) \end{pmatrix} E(G_{ij}) + 5E(G_{ij} G_{ik})E(G_{ij})^2 - 2E(G_{ij})^4 \\
 E(\bar{G}_{ij} \bar{G}_{jk} \bar{G}_{kl} \bar{G}_{il}) = E(G_{ij} G_{jk} G_{kl} G_{il}) - 4E(G_{ij} G_{jk} G_{kl})E(G_{ij}) + 4E(G_{ij} G_{ik})E(G_{ij})^2 - E(G_{ij})^4 \\
 E(\bar{G}_{ij}^2 \bar{G}_{kl}^2) = E(\bar{G}_{ij}^2)^2 = (E(G_{ij}^2) - E(G_{ij})^2)^2 \\
 E(\bar{G}_{ij} \bar{G}_{jk} \bar{G}_{kl} \bar{G}_{lm}) = E(G_{ij} G_{jk} G_{kl} G_{lm}) - 2E(G_{ij} G_{jk} G_{kl})E(G_{ij}) + E(G_{ij} G_{ik})E(G_{ij})^2 \\
 E(\bar{G}_{ij} \bar{G}_{ik} \bar{G}_{il} \bar{G}_{lm}) = E(G_{ij} G_{ik} G_{il} G_{lm}) - 4E(G_{ij} G_{ik} G_{il})E(G_{ij}) + 6E(G_{ij} G_{ik})E(G_{ij})^2 - 3E(G_{ij})^4 \\
 E(\bar{G}_{ij} \bar{G}_{ik} \bar{G}_{il} \bar{G}_{lm}) = E(G_{ij} G_{ik} G_{il} G_{lm}) - \begin{pmatrix} 2E(G_{ij} G_{jk} G_{kl}) \\ +E(G_{ij} G_{ik} G_{il}) \end{pmatrix} E(G_{ij}) + 3E(G_{ij} G_{ik})E(G_{ij})^2 - E(G_{ij})^4 \\
 E(\bar{G}_{ij} \bar{G}_{ik} \bar{G}_{lm}^2) = E(\bar{G}_{ij} \bar{G}_{ik})E(\bar{G}_{lm}^2) = (E(G_{ij} G_{ik}) - E(G_{ij})^2)(E(G_{lm}^2) - E(G_{lm})^2) \\
 E(\bar{G}_{ij} \bar{G}_{ik} \bar{G}_{lm} \bar{G}_{ln}) = E(\bar{G}_{ij} \bar{G}_{ik})^2 = (E(G_{ij} G_{ik}) - E(G_{ij})^2)^2
 \end{array} \right. \quad (S3)$$

$\mu_i, i = 4, 5, \dots, 23$  in **Appendix D** could be calculated by averaging the products of all possible  $\bar{d}_{ij}$  combinations in **Figure S3** from the following equations:

$$\left\{ \begin{array}{l}
\mu_4 = \binom{N}{2}^{-1} \sum_{i < j < k} \bar{d}_{ij}^3 \\
\mu_5 = 18 \binom{N}{3}^{-1} \sum_{i < j < k} (\bar{d}_{ij}^2 (\bar{d}_{ik} + \bar{d}_{jk}) + \bar{d}_{jk}^2 (\bar{d}_{ij} + \bar{d}_{ik}) + \bar{d}_{ik}^2 (\bar{d}_{ij} + \bar{d}_{jk})) / 6 \\
\mu_6 = 6 \binom{N}{3}^{-1} \sum_{i < j < k} \bar{d}_{ij} \bar{d}_{jk} \bar{d}_{ik} \\
\mu_7 = 72 \binom{N}{3}^{-1} \sum_{i < j < k} \left( \begin{array}{l} \bar{d}_{ij} \bar{d}_{kl} (\bar{d}_{ik} + \bar{d}_{il} + \bar{d}_{jk} + \bar{d}_{jl}) \\ + \bar{d}_{ik} \bar{d}_{jl} (\bar{d}_{ij} + \bar{d}_{il} + \bar{d}_{jk} + \bar{d}_{kl}) \\ + \bar{d}_{il} \bar{d}_{jk} (\bar{d}_{ij} + \bar{d}_{ik} + \bar{d}_{jl} + \bar{d}_{kl}) \end{array} \right) / 12 \\
\mu_8 = 24 \binom{N}{3}^{-1} \sum_{i < j < k} (\bar{d}_{ij} \bar{d}_{ik} \bar{d}_{il} + \bar{d}_{ij} \bar{d}_{jk} \bar{d}_{jl} + \bar{d}_{ik} \bar{d}_{jk} \bar{d}_{kl} + \bar{d}_{il} \bar{d}_{jl} \bar{d}_{kl}) / 4 \\
\mu_9 = \binom{N}{2}^{-1} \sum_{i < j} \bar{d}_{ij}^4 \\
\mu_{10} = 24 \binom{N}{3}^{-1} \sum_{i < j} (\bar{d}_{ij}^3 (\bar{d}_{ik} + \bar{d}_{jk}) + \bar{d}_{jk}^3 (\bar{d}_{ij} + \bar{d}_{ik}) + \bar{d}_{ik}^3 (\bar{d}_{ij} + \bar{d}_{jk})) / 6 \\
\mu_{11} = 18 \binom{N}{3}^{-1} \sum_{i < j < k} (\bar{d}_{ij}^2 \bar{d}_{ik}^2 + \bar{d}_{ij}^2 \bar{d}_{jk}^2 + \bar{d}_{ik}^2 \bar{d}_{jk}^2) / 3 \\
\mu_{12} = 36 \binom{N}{3}^{-1} \sum_{i < j < k} \bar{d}_{ij} \bar{d}_{jk} \bar{d}_{ik} (\bar{d}_{ij} + \bar{d}_{jk} + \bar{d}_{ik}) / 3 \\
\mu_{13} = 288 \binom{N}{4}^{-1} \sum_{i < j < k} \left( \begin{array}{l} \bar{d}_{ij} \bar{d}_{kl} (\bar{d}_{ij} + \bar{d}_{kl}) (\bar{d}_{ik} + \bar{d}_{il} + \bar{d}_{jk} + \bar{d}_{jl}) \\ + \bar{d}_{ik} \bar{d}_{jl} (\bar{d}_{ik} + \bar{d}_{jl}) (\bar{d}_{ij} + \bar{d}_{il} + \bar{d}_{jk} + \bar{d}_{kl}) \\ + \bar{d}_{il} \bar{d}_{jk} (\bar{d}_{il} + \bar{d}_{jk}) (\bar{d}_{ij} + \bar{d}_{ik} + \bar{d}_{jl} + \bar{d}_{kl}) \end{array} \right) / 24 \\
\mu_{14} = 144 \binom{N}{4}^{-1} \sum_{i < j < k} \left( \begin{array}{l} \bar{d}_{ij} \bar{d}_{kl} (\bar{d}_{ik}^2 + \bar{d}_{il}^2 + \bar{d}_{jk}^2 + \bar{d}_{jl}^2) \\ + \bar{d}_{ik} \bar{d}_{jl} (\bar{d}_{ij}^2 + \bar{d}_{il}^2 + \bar{d}_{jk}^2 + \bar{d}_{kl}^2) \\ + \bar{d}_{il} \bar{d}_{jk} (\bar{d}_{ij}^2 + \bar{d}_{ik}^2 + \bar{d}_{jl}^2 + \bar{d}_{kl}^2) \end{array} \right) / 12 \\
\mu_{15} = 144 \binom{N}{4}^{-1} \sum_{i < j < k} \left( \begin{array}{l} \bar{d}_{ij} \bar{d}_{ik} \bar{d}_{il} (\bar{d}_{ij} + \bar{d}_{ik} + \bar{d}_{il}) + \bar{d}_{ij} \bar{d}_{jk} \bar{d}_{jl} (\bar{d}_{ij} + \bar{d}_{jk} + \bar{d}_{jl}) \\ + \bar{d}_{ik} \bar{d}_{jk} \bar{d}_{kl} (\bar{d}_{ik} + \bar{d}_{jk} + \bar{d}_{kl}) + \bar{d}_{il} \bar{d}_{jl} \bar{d}_{kl} (\bar{d}_{il} + \bar{d}_{jl} + \bar{d}_{kl}) \end{array} \right) / 12 \\
\mu_{16} = 288 \binom{N}{4}^{-1} \sum_{i < j < k} \left( \begin{array}{l} \bar{d}_{ij} \bar{d}_{jk} \bar{d}_{ik} (\bar{d}_{il} + \bar{d}_{jl} + \bar{d}_{kl}) + \bar{d}_{ij} \bar{d}_{jl} \bar{d}_{il} (\bar{d}_{ik} + \bar{d}_{jk} + \bar{d}_{kl}) \\ + \bar{d}_{ik} \bar{d}_{kl} \bar{d}_{il} (\bar{d}_{ij} + \bar{d}_{jk} + \bar{d}_{jl}) + \bar{d}_{jk} \bar{d}_{kl} \bar{d}_{jl} (\bar{d}_{ij} + \bar{d}_{ik} + \bar{d}_{il}) \end{array} \right) / 12 \\
\mu_{17} = 72 \binom{N}{4}^{-1} \sum_{i < j < k} (\bar{d}_{ij} \bar{d}_{jk} \bar{d}_{kl} \bar{d}_{il} + \bar{d}_{ij} \bar{d}_{jl} \bar{d}_{kl} \bar{d}_{ik} + \bar{d}_{ik} \bar{d}_{jk} \bar{d}_{jl} \bar{d}_{il}) / 3 \\
\mu_{18} = 18 \binom{N}{4}^{-1} \sum_{i < j < k} (\bar{d}_{ij}^2 \bar{d}_{kl}^2 + \bar{d}_{ik}^2 \bar{d}_{jl}^2 + \bar{d}_{il}^2 \bar{d}_{jk}^2) / 3 \\
\mu_{19} = 1440 \binom{N}{5}^{-1} \sum_{i < j < k} (\text{sum of all 60 possible terms}) / 60 \\
\mu_{20} = 120 \binom{N}{5}^{-1} \sum_{i < j < k} \left( \begin{array}{l} \bar{d}_{ij} \bar{d}_{ik} \bar{d}_{il} \bar{d}_{im} + \bar{d}_{ij} \bar{d}_{jk} \bar{d}_{jl} \bar{d}_{jm} + \bar{d}_{ik} \bar{d}_{jk} \bar{d}_{kl} \bar{d}_{km} \\ + \bar{d}_{il} \bar{d}_{jl} \bar{d}_{kl} \bar{d}_{lm} + \bar{d}_{im} \bar{d}_{jm} \bar{d}_{km} \bar{d}_{lm} \end{array} \right) / 5 \\
\mu_{21} = 1440 \binom{N}{5}^{-1} \sum_{i < j < k} (\text{sum of all 60 possible terms}) / 60 \\
\mu_{22} = 360 \binom{N}{5}^{-1} \sum_{i < j < k} (\text{sum of all 30 possible terms}) / 30 \\
\mu_{23} = 2160 \binom{N}{6}^{-1} \sum_{i < j < k} (\text{sum of all 90 possible terms}) / 90
\end{array} \right. \quad (S4)$$

Calculation of  $\text{Cov}(G_{ij}, \Delta_{ij})$  and  $\text{Cov}(G_{ij}, \Delta_{ik})$ .

| Probabilities | $E_i = 0$ | $E_i = 1$ | Sum          |
|---------------|-----------|-----------|--------------|
| $g_i = 0$     | $p_{00}$  | $p_{01}$  | $p_{0\cdot}$ |

|           |               |               |              |
|-----------|---------------|---------------|--------------|
| $g_i = 1$ | $p_{10}$      | $p_{11}$      | $p_{1\cdot}$ |
| $g_i = 2$ | $p_{20}$      | $p_{21}$      | $p_{2\cdot}$ |
| Sum       | $p_{\cdot 0}$ | $p_{\cdot 1}$ | 1            |

This above table lists the joint distribution of  $(g, E)$ . Based on this table, we have

$$\left\{ \begin{array}{l} E(G_{ij}) = \sum_{i,j \in \{0,1,2\}} p_i p_{j\cdot} |i - j| = 2p_{0\cdot} p_{1\cdot} + 2p_{1\cdot} p_{2\cdot} + 4p_{0\cdot} p_{2\cdot} \\ E(\Delta_{ij}) = \sum_{i,j \in \{0,1,2\}} \sum_{a,b \in \{0,1\}} p_{ia} p_{jb} |ia - jb| \\ \quad = 2p_{11}(1 - p_{11}) + 4p_{21}(1 - p_{11} - p_{21}) \\ E(G_{ij}\Delta_{ij}) = \sum_{i,j \in \{0,1,2\}} \sum_{a,b \in \{0,1\}} p_{ia} p_{jb} |i - j| |ia - jb| \\ \quad = 2p_{11}(p_{0\cdot} + p_{2\cdot}) + 4p_{21}p_{10} + 8p_{21}p_{0\cdot} \\ E(G_{ij}\Delta_{ik}) = \sum_{i,j,k \in \{0,1,2\}} \sum_{a,b,c \in \{0,1\}} p_{ia} p_{jb} p_{kc} |i - j| |ia - kc| \\ \quad = p_{0\cdot}(p_{11} + 2p_{21})(p_{1\cdot} + 2p_{2\cdot}) + p_{10}(p_{11} + 2p_{21})(p_{0\cdot} + p_{2\cdot}) \\ \quad \quad + p_{11}(1 - p_{11})(p_{0\cdot} + p_{2\cdot}) + p_{20}(p_{11} + 2p_{21})(p_{1\cdot} + 2p_{0\cdot}) \\ \quad \quad + p_{21}(p_{11} + 2(p_{0\cdot} + p_{01}))(p_{1\cdot} + 2p_{0\cdot}) \\ \text{Cov}(G_{ij}, \Delta_{ij}) = E(G_{ij}\Delta_{ij}) - E(G_{ij})E(\Delta_{ij}) \\ \text{Cov}(G_{ij}, \Delta_{ik}) = E(G_{ij}\Delta_{ik}) - E(G_{ij})E(\Delta_{ij}) \end{array} \right. \quad (\text{S5})$$
